# Supplementary material for: Enhanced photoelectrochemical performance of CdSe quantum dot sensitized SrTiO3
Source: Royal Society of Chemistry journal article supplement (doi:10.1039/c5ta00304k), 2015-01-01
Supplement: c5ta00304k1.pdf [file c5ta00304k1.pdf]

**Supporting Information**

**Enhanced Photoelectrochemical Performance of CdSe Quantum Dots  
Sensitized SrTiO<sub>3</sub>**

Gosipathala Sreedhar,<sup>a\*</sup> A. Sivanantham,<sup>a</sup> S. Venkateshwaran,<sup>b</sup> Subhendu K. Panda<sup>b\*</sup> and M.  
Eashwar<sup>c</sup>

<sup>a</sup>Electropyro Metallurgy Division, CSIR-Central Electrochemical Research Institute,  
Karaikudi, Tamil Nadu- 630006, India.E-Mail: gsreedhar@cecri.res.in.

<sup>b</sup>EMFT Division, CSIR-Central Electrochemical Research Institute, Karaikudi, Tamil Nadu-  
630006, India.E-Mail: skpanda@cecri.res.in.

<sup>c</sup>Corrosion Testing Centre, CSIR-Central Electrochemical Research Institute,  
Mandapam Camp, Tamil Nadu- 630006, India.

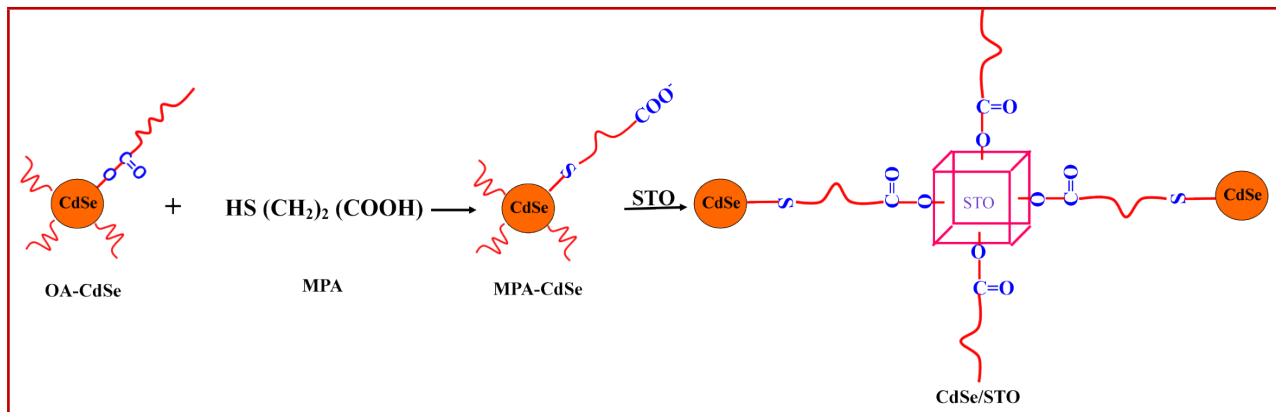

**Scheme S-I.** Schematic representation of CdSe QDs sensitization on STO nanocubes.

The linking of the red CdSe QDs on STO surface was achieved by using mercaptopropionic acid (MPA) as a linker (**Scheme S-I**). The oleic acid (OA) that was originally presented on as-prepared CdSe QDs surface was replaced by MPA. OA capped CdSe QDs were not suitable to be attached with STO. Therefore, the modification of OA capped CdSe QDs was performed by a ligand exchange process using hydrophilic linker MPA, which also maximised CdSe QDs loading on to STO surface.

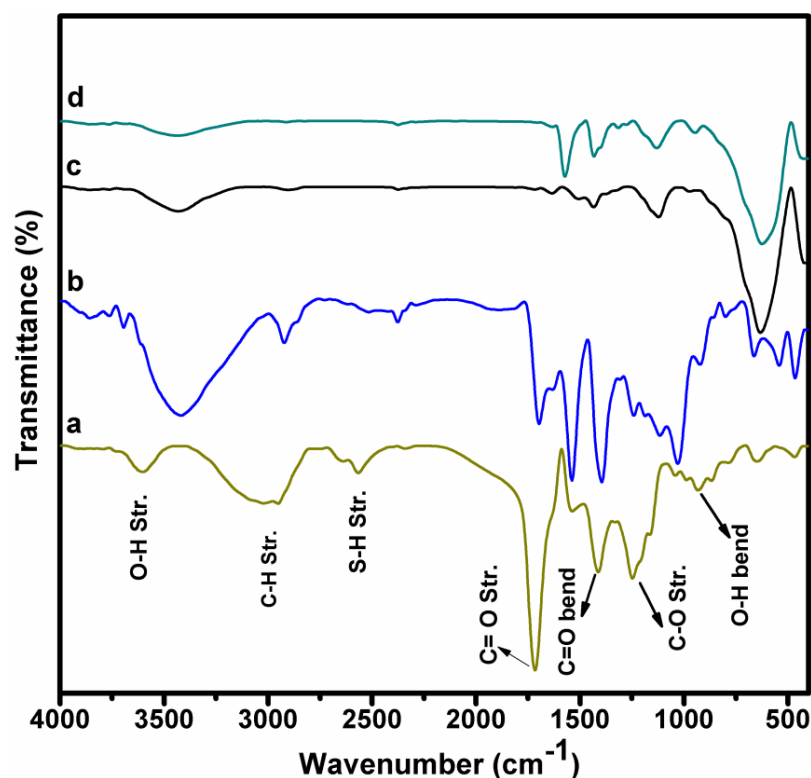

**Fig. S1** FTIR spectra of (a) Mercaptopropionic acid (b) R-CdSe QDs (c) STO and (d) R-CdSe-MPA-STO photo electrodes.

Fig. S1a,b,c,d present FTIR spectra for mercaptopropionic acid, red CdSe QDs, STO and CdSe-MPA-STO, respectively. The linking mechanism as shown in Scheme S-I is explained with the help of FTIR analysis and discussed here. The peak associated with S-H stretching in MPA ( $2564\text{ cm}^{-1}$ ) (Fig. S1a) was suppressed in MPA capped CdSe (Fig. S1b), while the  $\text{-CH}$  stretching peak shifted from  $3000 - 2900\text{ cm}^{-1}$  as noted earlier.<sup>[S1]</sup> This observation indicates the bond formation between thiol group of MPA and CdSe QDs. The Fig. S1c exhibits the IR spectrum of STO, in which the vibrational band at  $632.40\text{ cm}^{-1}$  corresponds to the stretching vibration of Sr-O and weak peak at  $428.36\text{ cm}^{-1}$  is due to the Ti-O bending vibration.<sup>[S2]</sup> Another functional group, namely, carbonyl group in MPA is attached with STO. The peak associated for  $\text{-OH}$  stretching at  $3417\text{ cm}^{-1}$  in MPA (Fig. S1a) is suppressed in MPA capped

CdSe QDs loaded on STO (Figure S1d) and C=O stretching is shifted from 1718 to 1575  $\text{cm}^{-1}$ , which (Fig. S1a and d) confirms the bonding between –COOH carbonyl group and STO.<sup>[S1]</sup>

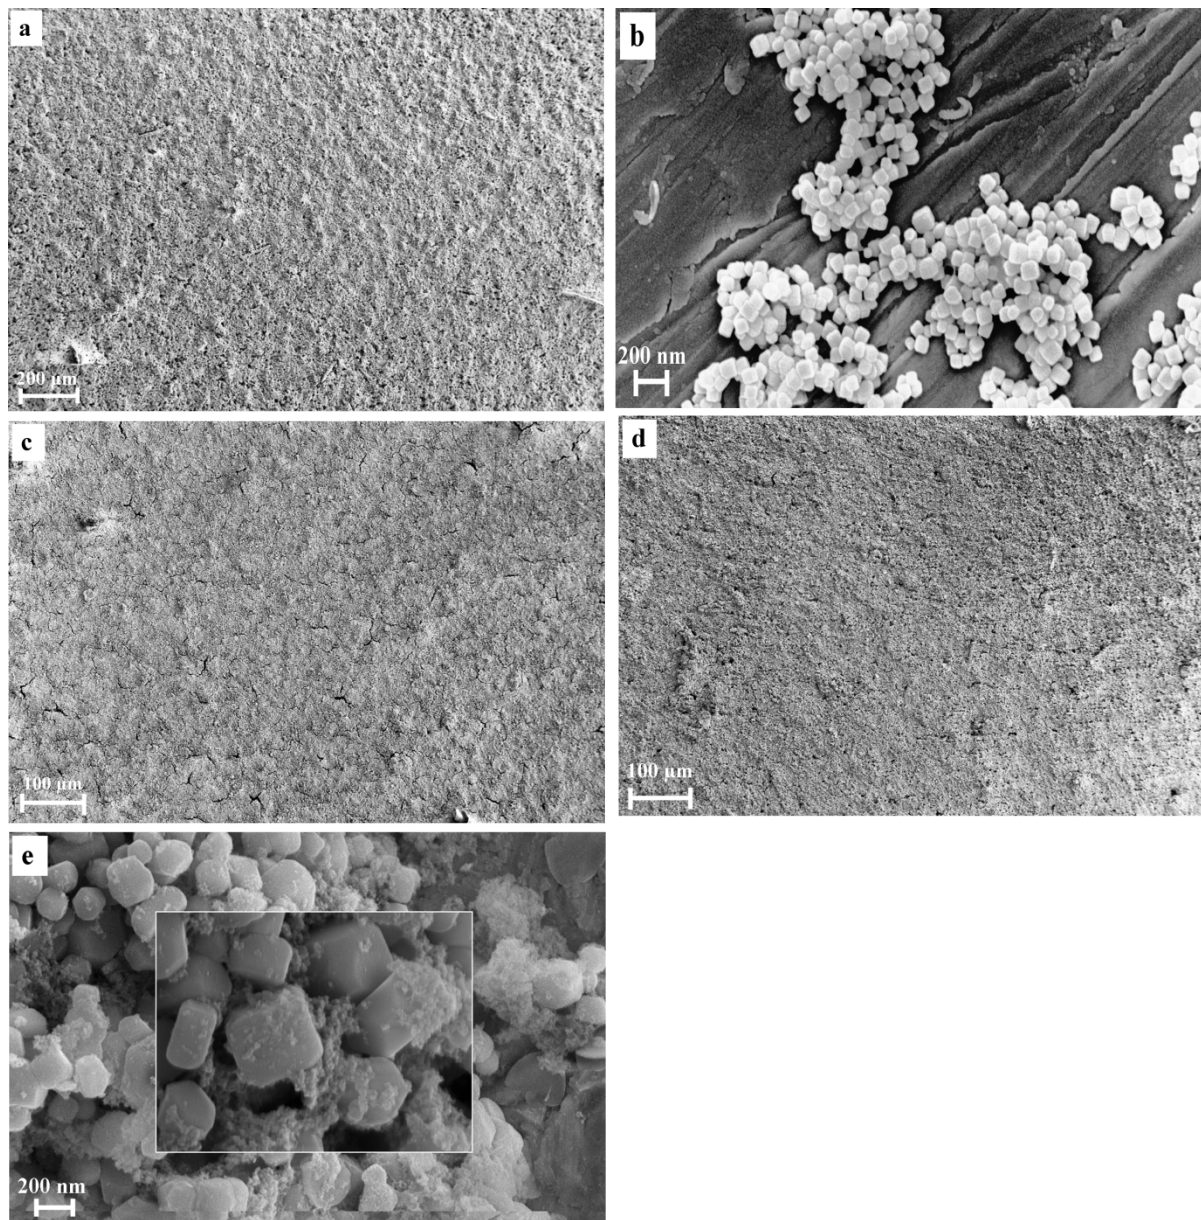

**Fig. S2** FESEM images of STO (a,b), QDs (c) and QDs-STO (d,e) photo electrodes.

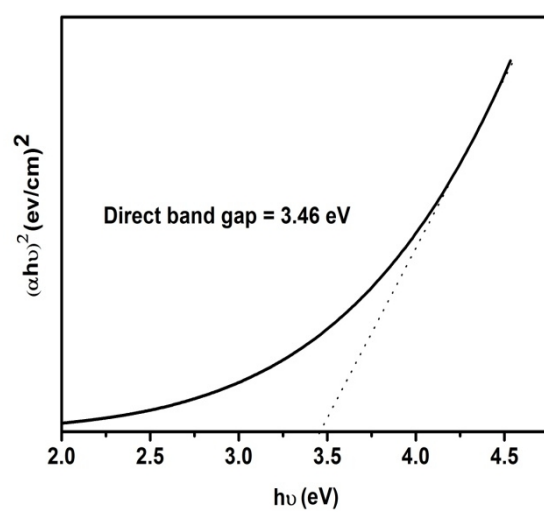

**Fig. S3** Tauc Plot for STO photo electrode.

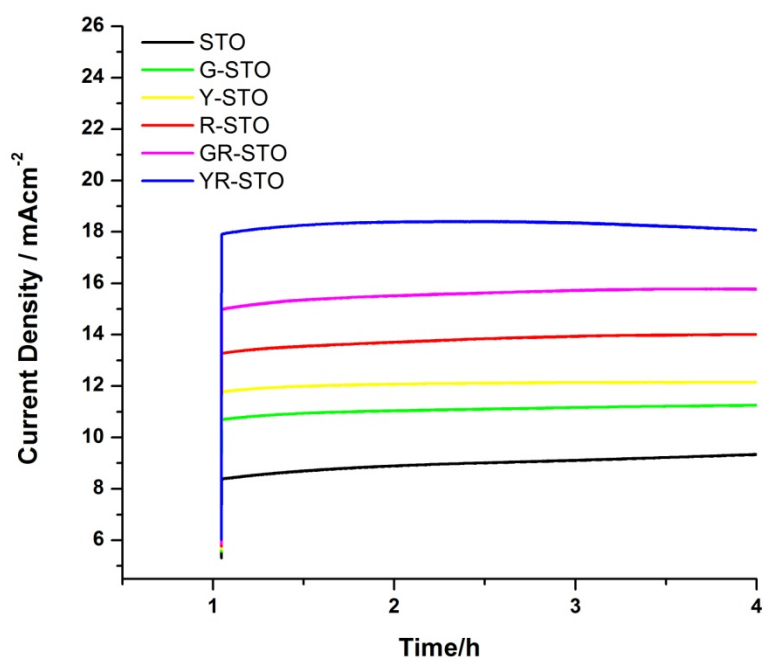

**Fig. S4** i-t curves of STO and CdSe sensitized STO photo electrode under illumination condition.

## References

- S1 J. Huang, S. Liu, L. Kuang, Y. Zhao, T. Jiang, S. Liu and X. Xu, *J. Environ. Sci.*, 2013, **25**, 2487.
- S2 P. Jayabal, V. Sasirekha, J. Mayandi, K. Jeganathan and V. Ramakrishnan, *J. Alloys Compd.*, 2014, **586**, 456.
